# Supplementary material for: Energy Balance of Turbocharged Engines Operating in a WWTP with Thermal Hydrolysis. Co-Digestion Provides the Full Plant Energy Demand
Source: MDPI journal article supplement (doi:10.3390/app112311103), 2021-11-23
Supplement: s1 [file s1]

Supplementary material: Table S1 and S2

# Energy Balance of Turbocharged Engines Operating in a WWTP with Thermal Hydrolysis. Co-Digestion Provides the Full Plant Energy Demand

José García-Cascallana <sup>1</sup>, Daniela Carrillo-Peña <sup>2</sup>, Antonio Morán <sup>2</sup>, Richar Smith <sup>3</sup> and  
Xiomar Gómez <sup>2,\*</sup>

<sup>1</sup> Area of Chemical Engineering, Department of Applied Chemistry and Physics, University of León, Campus de Vegazana, 24071 León, Spain; jgc0504@yahoo.es

<sup>2</sup> Chemical and Environmental Bioprocess Engineering Group, Natural Resources Institute (IRENA), University of León, Avda. De Portugal 41, 24009 León, Spain; dcarp@unileon.es (D.C.-P.); amorp@unileon.es (A.M.)

<sup>3</sup> Department of Chemical and Environmental Engineering, University of Nottingham, Coates Building B12, Nottingham, NG7 2RD, UK; r.smith@nottingham.ac.uk

\* Correspondence: xagomb@unileon.es

**Table S1.** Heat capacity and specific enthalpy of the fluid flowing through the compressor, intercooler and turbine.

| Point              | C <sub>p</sub> (kJ/kg*K) | *Specific enthalpy |
|--------------------|--------------------------|--------------------|
| <b>Compressor</b>  |                          |                    |
| 0                  | 1.004                    | 0                  |
| 1s                 | 1.009                    | 59.9               |
| 1                  | 1.011                    | 80                 |
| <b>Intercooler</b> |                          |                    |
| 2s                 | 1.007                    | 38.4               |
| 2                  | 1.007                    | 40.4               |
| <b>Turbine</b>     |                          |                    |
| 3                  | 1.101                    | 571.6              |
| 4s                 | 1.080                    | 462.2              |
| 4                  | 1.085                    | 489.2              |

\*Reference temperature of specific enthalpy (25 °C)

**Table S2.** Energy parameters of compressor, intercooler and turbine.

| Parameter   | Mass flow (kg/h) | Compression or expansion ratio (w.u.) | Power (kW) | Losses (kW) | Percentage of losses (%) |
|-------------|------------------|---------------------------------------|------------|-------------|--------------------------|
| Compressor  | 1,469.5          | 1.9                                   | 32.7       | 8.4         | 25.7                     |
| Intercooler | 1,496.5          | ...                                   | 16.2       | 0.9         | 5.6                      |
| Turbine     | 1,469.5          | 1.5                                   | 33.7       | *1.0/11.0   | 32.6                     |

\*Mechanical / thermal losses of the turbine
